# Supplementary material for: Health care professionals’ perceptions of factors influencing the process of identifying patients for serious illness conversations: A qualitative study
Source: PubMed Central journal article supplement (PMC9247430; doi:10.1177/02692163221102266), 2022-06-21
Supplement: sj-pdf-2-pmj-10.1177_02692163221102266.pdf [file sj-pdf-2-pmj-10.1177_02692163221102266.pdf]

## **SUPPLEMENTARY FILE. OBSERVATION GUIDE**

**Title of article:** "Health care professionals' perceptions of factors influencing the process of identifying patients for serious illness conversations: A qualitative study"

Date:

Time:

Location:

Length of the meeting:

Name of researcher:

Clinician leading the meeting:

Number of participants and their professions:

1. What criteria are considered grounds for identifying which of the patients should be offered a serious illness conversation?
2. Subjects regarding ethical and existential concerns in relation to identification.
3. What facilitates or hinders identification?
4. The observers' own reflections of the process
